# Supplementary material
Source: HighWire-hosted journal article supplement (https://erj.ersjournals.com/content/56/1/2001812)
Supplement: inline-supplementary-material-1 [file inline-supplementary-material-1.pdf]

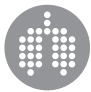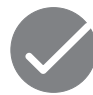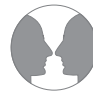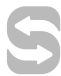

SHAREABLE PDF

# COVID-19 in Italy: passing through bitter waters

Lorenzo Guglielmetti <sup>1,2,3</sup> and Sheila Chiesi <sup>4</sup>

**Affiliations:** <sup>1</sup>Infectious Diseases Unit, Piacenza Hospital, Piacenza, Italy. <sup>2</sup>APHP, Sorbonne Université, Site Pitié-Salpêtrière, Centre National de Référence des Mycobactéries et de la Résistance des Mycobactéries aux Antituberculeux, Paris, France. <sup>3</sup>Sorbonne Université, INSERM, U1135, Centre d'Immunologie et des Maladies Infectieuses, Cimi-Paris, équipe 2, Paris, France. <sup>4</sup>'Spedali Civili' Hospital of Brescia, Brescia, Italy.

**Correspondence:** Lorenzo Guglielmetti, Laboratoire de Bactériologie-Hygiène, Faculté de Médecine Sorbonne Université, 91 Boulevard de l'hôpital, 75634 Paris Cedex 13, France. E-mail: [lorenzo.guglielmetti@aphp.fr](mailto:lorenzo.guglielmetti@aphp.fr)

 @ERSpublications

**The COVID-19 epidemic in Italy has shown many shortcomings in the national healthcare system but it also represents a historic opportunity to reinforce central healthcare governance and reduce inequalities across the country** <https://bit.ly/3gaP9Qi>

**Cite this article as:** Guglielmetti L, Chiesi S. COVID-19 in Italy: passing through bitter waters. *Eur Respir J* 2020; 56: 2001812 [<https://doi.org/10.1183/13993003.01812-2020>].

This single-page version can be shared freely online.

*To the Editor:*

The catastrophic impact of the coronavirus disease 2019 (COVID-19) epidemic in Italy has previously been described [1, 2]. In a recent editorial, NAVA *et al.* [3] paid a well-deserved tribute to the almost 200 healthcare workers who succumbed to COVID-19 in the country in less than 3 months since the first case was reported. We would like to contribute with some considerations on the shortcomings of Italy's response to the pandemic.
